# Supplementary material for: Liposome-embedded SOD attenuated DSS-induced ulcerative colitis in mice by ameliorating oxidative stress and intestinal barrier dysfunction
Source: Royal Society of Chemistry journal article supplement (doi:10.1039/d2fo03312g), 2023-01-01
Supplement: d2fo03312g1.pdf [file d2fo03312g1.pdf]

Table S1 Criteria for scoring of histopathological damage

| Parameters                                     | Score | Description                    |
|------------------------------------------------|-------|--------------------------------|
| Inflammation                                   | 0     | Normal                         |
|                                                | 1     | Mild                           |
|                                                | 2     | Moderate                       |
|                                                | 3     | Severe                         |
| Crypt damage hydrolysate                       | 0     | Normal                         |
| Positive control                               | 1     | Basal 1/3 damaged              |
|                                                | 2     | Basal 2/3 damaged              |
|                                                | 3     | Only surface epithelium intact |
|                                                | 4     | All damage                     |
| Extent of lesion                               | 0     | <1%                            |
|                                                | 1     | 1-25%                          |
|                                                | 2     | 26-50%                         |
|                                                | 3     | 51-75%                         |
|                                                | 4     | 76-100%                        |
| Cupped cell deficiency                         | 0     | Normal                         |
|                                                | 1     | Mild                           |
|                                                | 2     | Moderate                       |
|                                                | 3     | Severe                         |
| Inflammatory cell infiltration into the mucosa | 0     | Normal                         |
|                                                | 1     | Mucosa                         |
|                                                | 2     | Submucosa and mucosa           |
|                                                | 3     | Mucosa penetrated              |

Table S2 Characterization of SOD and L-SOD.

|       | Encapsulation efficiency (%) | Particle size (nm)       | Polydispersity index     | Enzyme activity retention rate (%) |
|-------|------------------------------|--------------------------|--------------------------|------------------------------------|
| SOD   | /                            | 9.19±0.23 <sup>a</sup>   | 0.662±0.033 <sup>a</sup> | 0.72±0.04 <sup>a</sup>             |
| L-SOD | 40.38±2.53%                  | 252.30±1.73 <sup>b</sup> | 0.240±0.016 <sup>b</sup> | 26.81±1.12 <sup>b</sup>            |
| BL    | /                            | 232.30±1.76 <sup>c</sup> | 0.289±0.015 <sup>c</sup> | /                                  |

Different letters imply statistically significant differences at the level of P < 0.05.
